---

Erratum

## Erratum to: BAli-Phy version 3: model-based co-estimation of alignment and phylogeny

Benjamin D. Redelings 

---

*Bioinformatics* (2021), 37(18), 3032–3034, <https://doi.org/10.1093/bioinformatics/btab129>

In the originally published version of this manuscript, there was an error in the title.

The title should read: “BAli-Phy version 3: model-based co-estimation of alignment and phylogeny”. Instead of: “Bali-Phy version 3: model-based co-estimation of alignment and phylogeny”.

This error has been corrected online. The publisher apologizes for the error
